# Supplementary material for: A systematic review of tailored eHealth interventions for weight loss
Source: PubMed Central journal article supplement — Digit Health. 2019 Feb 5;5:2055207619826685. doi: 10.1177/2055207619826685 (PMC6366004; doi:10.1177/2055207619826685), 2019-02-05
Supplement: Supplemental_Material1.pdf [file Supplemental_Material1.pdf]

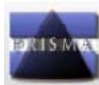

# PRISMA 2009 Checklist (Adapted for KIN 4400)

| Section/topic                      | #  | Checklist item                                                                                                                                                                                                                                                       | Reported on page # |
|------------------------------------|----|----------------------------------------------------------------------------------------------------------------------------------------------------------------------------------------------------------------------------------------------------------------------|--------------------|
| <b>TITLE</b>                       |    |                                                                                                                                                                                                                                                                      |                    |
| Title                              | 1  | Identify the report as a literature review.                                                                                                                                                                                                                          | 1                  |
| <b>ABSTRACT</b>                    |    |                                                                                                                                                                                                                                                                      |                    |
| Structured summary                 | 2  | Provide a structured summary including, as applicable: background; objectives; data sources; study eligibility criteria, participants, and interventions; study appraisal and synthesis methods; results; limitations; conclusions and implications of key findings; | 1                  |
| <b>INTRODUCTION</b>                |    |                                                                                                                                                                                                                                                                      |                    |
| Rationale                          | 3  | Describe the rationale for the review in the context of what is already known about your topic.                                                                                                                                                                      | 3                  |
| Objectives                         | 4  | Provide an explicit statement of questions being addressed with reference to participants, interventions, comparisons, outcomes, and study design (PICOS).                                                                                                           | 3                  |
| <b>METHODS</b>                     |    |                                                                                                                                                                                                                                                                      |                    |
| Eligibility criteria               | 5  | Specify study characteristics (e.g., PICOS, length of follow-up) and report characteristics (e.g., years considered, language, publication status) used as criteria for eligibility, giving rationale.                                                               | 4                  |
| Information sources                | 6  | Describe all information sources (e.g., databases with dates of coverage) in the search and date last searched.                                                                                                                                                      | 4                  |
| Search                             | 7  | Present full electronic search strategy for at least one database, including any limits used, such that it could be repeated.                                                                                                                                        | Appendix B         |
| Study selection                    | 8  | State the process for selecting studies (i.e., screening, eligibility).                                                                                                                                                                                              | 4                  |
| Risk of bias in individual studies | 9  | Describe methods used for assessing risk of bias of individual studies (including specification of whether this was done at the study or outcome level).                                                                                                             | 5                  |
|                                    |    |                                                                                                                                                                                                                                                                      |                    |
| Risk of bias across studies        | 10 | Specify any assessment of risk of bias that may affect the cumulative evidence (e.g., publication bias, selective reporting within studies).                                                                                                                         | 5; 11              |
| <b>RESULTS</b>                     |    |                                                                                                                                                                                                                                                                      |                    |
| Study selection                    | 11 | Give numbers of studies screened, assessed for eligibility, and included in the review, with reasons for exclusions at each stage, ideally with a flow diagram.                                                                                                      | 5-6                |



## PRISMA 2009 Checklist (Adapted for KIN 4400)

| Section/topic                              | #  | Checklist item                                                                                                                                                                                                                            | Reported on page # |
|--------------------------------------------|----|-------------------------------------------------------------------------------------------------------------------------------------------------------------------------------------------------------------------------------------------|--------------------|
| Study characteristics                      | 12 | For each study, present characteristics for which data were extracted (e.g., study size, PICOS, follow-up period) and provide the citations.                                                                                              | 7-10               |
| Synthesis of results of individual studies | 13 | For all outcomes considered (benefits or harms), present, for each study: (a) summary of results and (b) relationship to other studies under review (e.g. agreements or disagreements in methods, sampling, data collection or findings). | 6;11-18            |
| <b>DISCUSSION</b>                          |    |                                                                                                                                                                                                                                           |                    |
| Summary of evidence                        | 14 | Summarize the main findings including the strength of evidence for each main outcome; consider their relevance to key groups (e.g., healthcare providers, users, and policy makers).                                                      | 17-21              |
| Limitations                                | 15 | Discuss limitations at study and outcome level (e.g., risk of bias), and at review-level (e.g., incomplete retrieval of identified research, reporting bias).                                                                             | 21                 |
| <b>CONCLUSION</b>                          |    |                                                                                                                                                                                                                                           |                    |
| Conclusions                                | 16 | Provide a general interpretation of the results in the context of other evidence, and implications for future research.                                                                                                                   | 21                 |

Adapted from: Moher D, Liberati A, Tetzlaff J, Altman DG, The PRISMA Group (2009). Preferred Reporting Items for Systematic Reviews and Meta-Analyses: The PRISMA statement. *PLoS Medicine*, 6(6), e1000097. doi:10.1371/journal.pmed1000097

For more information, visit: [www.prisma-statement.org](http://www.prisma-statement.org).
