# Supplementary material for: A systematic review of tailored eHealth interventions for weight loss
Source: PubMed Central journal article supplement — Digit Health. 2019 Feb 5;5:2055207619826685. doi: 10.1177/2055207619826685 (PMC6366004; doi:10.1177/2055207619826685), 2019-02-05
Supplement: Supplemental_Material3.pdf [file Supplemental_Material3.pdf]

## eHealth Search Terms

EBSCO 1/12/16

CINAHL Plus with Full Text;MEDLINE;PsycARTICLES;Psychology and Behavioral Sciences Collection;PsycINFO

| Concept                         | Search Term                                                                                                                                                                                                                                                                          | Hits    |
|---------------------------------|--------------------------------------------------------------------------------------------------------------------------------------------------------------------------------------------------------------------------------------------------------------------------------------|---------|
| 1. personalisation              | TI personalis* OR individualis* OR tailor* OR custom*                                                                                                                                                                                                                                | 30,827  |
| 2. eHealth                      | AB ehealth or e-health or website or web or web-based or website-based or online or internet                                                                                                                                                                                         | 305,005 |
| 3. overweight                   | SU overweight or obesity or obese or weight management or weightloss or weight loss or diet* or physical activity                                                                                                                                                                    | 814,008 |
| 1+2+3                           | TI personalis* OR individualis* OR tailor* OR custom* AND AB ( ehealth or e-health or website or web or web-based or website-based or online or internet ) AND SU ( overweight or obesity or obese or weight management or weightloss or weight loss or diet* or physical activity ) | 142     |
| Limit to peer-reviewed journals |                                                                                                                                                                                                                                                                                      | 78      |

Science Direct 1/12/16

| Concept            | Search Term                                                                                                                                                                                                                                                                                                                   | Hits      |
|--------------------|-------------------------------------------------------------------------------------------------------------------------------------------------------------------------------------------------------------------------------------------------------------------------------------------------------------------------------|-----------|
| 1. personalisation | TITLE-ABSTR-KEY(personalis* OR individualis* OR tailor* OR custom*)                                                                                                                                                                                                                                                           | 82,840    |
| 2. eHealth         | TITLE-ABSTR-KEY (ehealth OR e-health OR website OR web OR web-based OR website-based OR online OR internet)                                                                                                                                                                                                                   | 2,110,874 |
| 3. overweight      | TITLE-ABSTR-KEY(overweight OR obesity OR obese OR weight management OR weightloss OR weight loss OR diet* OR physical activity)                                                                                                                                                                                               | 15,255    |
| 1+2+3              | (TITLE-ABSTR-KEY(personalis* OR individualis* OR tailor* OR custom*)) AND (TITLE-ABSTR-KEY(ehealth or e-health or website or web or web-based or website-based or online or internet)) AND (TITLE-ABSTR-KEY(overweight or obesity or obese or weight management or weightloss or weight loss or diet* or physical activity)). | 75        |

## PubMed 1/12/2016 (MEDLINE)

| Concept                                                 | Search Term                                                                                                                                                                                                                                                                                                                                                                                                                                                                                                                                       | Hits    |
|---------------------------------------------------------|---------------------------------------------------------------------------------------------------------------------------------------------------------------------------------------------------------------------------------------------------------------------------------------------------------------------------------------------------------------------------------------------------------------------------------------------------------------------------------------------------------------------------------------------------|---------|
| 1. personalisation                                      | (personalis*[Title/Abstract] OR individualis*[Title/Abstract] OR tailor*[Title/Abstract] OR custom*[Title/Abstract])                                                                                                                                                                                                                                                                                                                                                                                                                              | 116,616 |
| 2. eHealth                                              | (ehealth[Title/Abstract] OR e-health[Title/Abstract] OR website[Title/Abstract] OR web[Title/Abstract] OR web-based[Title/Abstract] OR website-based[Title/Abstract] OR online[Title/Abstract] OR internet[Title/Abstract])                                                                                                                                                                                                                                                                                                                       | 163,651 |
| 3. overweight                                           | (overweight[Title/Abstract] OR obesity[Title/Abstract] OR obese[Title/Abstract])                                                                                                                                                                                                                                                                                                                                                                                                                                                                  | 239,251 |
| 4. overweight + weight management terms                 | (overweight[Title/Abstract] OR obesity[Title/Abstract] OR obese[Title/Abstract] OR weight management[Title/Abstract] OR diet*[Title/Abstract] OR weightloss[Title/Abstract])                                                                                                                                                                                                                                                                                                                                                                      | 604,937 |
| 5. 1+2+3                                                | (((((personalis*[Title/Abstract] OR individualis*[Title/Abstract] OR tailor*[Title/Abstract] OR custom*[Title/Abstract]))) AND ((ehealth[Title/Abstract] OR e-health[Title/Abstract] OR website[Title/Abstract] OR web[Title/Abstract] OR web-based[Title/Abstract] OR website-based[Title/Abstract] OR online[Title/Abstract] OR internet[Title/Abstract]))) AND ((overweight[Title/Abstract] OR obesity[Title/Abstract] OR obese[Title/Abstract])))                                                                                             | 182     |
| 6. 1+2+4                                                | (((((personalis*[Title/Abstract] OR individualis*[Title/Abstract] OR tailor*[Title/Abstract] OR custom*[Title/Abstract]))) AND ((ehealth[Title/Abstract] OR e-health[Title/Abstract] OR website[Title/Abstract] OR web[Title/Abstract] OR web-based[Title/Abstract] OR website-based[Title/Abstract] OR online[Title/Abstract] OR internet[Title/Abstract]))) AND ((overweight[Title/Abstract] OR obesity[Title/Abstract] OR obese[Title/Abstract] OR weight management[Title/Abstract] OR diet*[Title/Abstract] OR weightloss[Title/Abstract]))) | 327     |
| 7. Altered concept one, term must be contained in title | (personalis*[Title] OR individualis*[Title] OR tailor*[Title] OR custom*[Title])                                                                                                                                                                                                                                                                                                                                                                                                                                                                  | 14,871  |
| 8. 7+2+3                                                | (((((personalis*[Title] OR individualis*[Title] OR tailor*[Title] OR custom*[Title]))) AND ((ehealth[Title/Abstract] OR e-health[Title/Abstract] OR website[Title/Abstract] OR web[Title/Abstract] OR web-based[Title/Abstract] OR website-based[Title/Abstract] OR online[Title/Abstract] OR internet[Title/Abstract]))) AND ((overweight[Title/Abstract] OR obesity[Title/Abstract] OR obese[Title/Abstract])))                                                                                                                                 | 21      |
| 9. 7+2+4                                                | (((((personalis*[Title] OR individualis*[Title] OR tailor*[Title] OR custom*[Title]))) AND ((ehealth[Title/Abstract] OR e-health[Title/Abstract] OR website[Title/Abstract] OR web[Title/Abstract] OR web-based[Title/Abstract] OR website-based[Title/Abstract] OR online[Title/Abstract] OR internet[Title/Abstract]))) AND ((overweight[Title/Abstract] OR obesity[Title/Abstract] OR obese[Title/Abstract] OR weight management[Title/Abstract] OR diet*[Title/Abstract] OR weightloss[Title/Abstract])))                                     | 58      |
| 10. More terms added to concept 4                       | (overweight[Title/Abstract] OR obesity[Title/Abstract] OR obese[Title/Abstract] OR weight management[Title/Abstract] OR weight loss[Title/Abstract] OR weightloss[Title/Abstract] OR diet*[Title/Abstract] OR physical activity[Title/Abstract])                                                                                                                                                                                                                                                                                                  | 693,044 |

|            |                                                                                                                                                                                                                                                                                                                                                                                                                                                                                                                                                                                   |     |
|------------|-----------------------------------------------------------------------------------------------------------------------------------------------------------------------------------------------------------------------------------------------------------------------------------------------------------------------------------------------------------------------------------------------------------------------------------------------------------------------------------------------------------------------------------------------------------------------------------|-----|
| 11. 7+2+10 | (((((personalis*[Title] OR individualis*[Title] OR tailor*[Title] OR custom*[Title]))) AND ((ehealth[Title/Abstract] OR e-health[Title/Abstract] OR website[Title/Abstract] OR web[Title/Abstract] OR web-based[Title/Abstract] OR website-based[Title/Abstract] OR online[Title/Abstract] OR internet[Title/Abstract]))) AND ((overweight[Title/Abstract] OR obesity[Title/Abstract] OR obese[Title/Abstract] OR weight management[Title/Abstract] OR weight loss[Title/Abstract] OR weightloss[Title/Abstract] OR diet*[Title/Abstract] OR physical activity[Title/Abstract]))) | 132 |
|------------|-----------------------------------------------------------------------------------------------------------------------------------------------------------------------------------------------------------------------------------------------------------------------------------------------------------------------------------------------------------------------------------------------------------------------------------------------------------------------------------------------------------------------------------------------------------------------------------|-----|

Embase 1/12/16

| Concept                | Search Term                                                                                                                                                                                  | Hits    |
|------------------------|----------------------------------------------------------------------------------------------------------------------------------------------------------------------------------------------|---------|
| 1. personalisation     | personalis*:ti OR individualis*:ti OR tailor*:ti OR custom*:ti                                                                                                                               | 17,985  |
| 2. eHealth             | ehealth:ab,ti OR 'e health':ab,ti OR website:ab,ti OR web:ab,ti OR 'web based':ab,ti OR 'website based':ab,ti OR online:ab,ti OR internet:ab,ti                                              | 204,464 |
| 3. overweight          | overweight:ab,ti OR obesity:ab,ti OR obese:ab,ti OR weight:ab,ti AND management:ab,ti OR weightloss:ab,ti OR weight:ab,ti AND loss:ab,ti OR diet*:ab,ti OR physical:ab,ti AND activity:ab,ti | 232,798 |
| 1+2+3                  |                                                                                                                                                                                              | 99      |
| Exclude Medline papers |                                                                                                                                                                                              | 57      |

Web of Science 5/12/16

Indexes=SCI-EXPANDED, SSCI, A&HCI, CPCI-S, CPCI-SSH, BKCI-S, BKCI-SSH, ESCI, CCR-EXPANDED, IC  
Timespan=All years

| Concept                          | Search Term                                                                                                             | Hits      |
|----------------------------------|-------------------------------------------------------------------------------------------------------------------------|-----------|
| 1. personalisation               | TITLE: (personalis* OR individualis* OR tailor* OR custom*)                                                             | 61,222    |
| 2. eHealth                       | TOPIC: (ehealth or e-health or website or web or web-based or website-based or online or internet)                      | 631,052   |
| 3. overweight                    | TOPIC: (overweight or obesity or obese or weight management or weightloss or weight loss or diet* or physical activity) | 1,187,417 |
| 1+2+3                            |                                                                                                                         | 198       |
| Limit to article or review paper |                                                                                                                         | 174       |

Follow up searches: conducted 15.03.18

EBSCO

CINAHL Plus with Full Text;MEDLINE;PsycARTICLES;Psychology and Behavioral Sciences Collection;PsycINFO

| Concept                  | Search Term                                                                                                                                                                                                                                                                          | Hits   |
|--------------------------|--------------------------------------------------------------------------------------------------------------------------------------------------------------------------------------------------------------------------------------------------------------------------------------|--------|
| 1. personalisation       | TI personalis* OR individualis* OR tailor* OR custom*                                                                                                                                                                                                                                | 3,586  |
| 2. eHealth               | AB ehealth or e-health or website or web or web-based or website-based or online or internet                                                                                                                                                                                         | 64,067 |
| 3. overweight            | SU overweight or obesity or obese or weight management or weightloss or weight loss or diet* or physical activity                                                                                                                                                                    | 55,134 |
| 1+2+3                    | TI personalis* OR individualis* OR tailor* OR custom* AND AB ( ehealth or e-health or website or web or web-based or website-based or online or internet ) AND SU ( overweight or obesity or obese or weight management or weightloss or weight loss or diet* or physical activity ) | 20     |
| Following De-duplication |                                                                                                                                                                                                                                                                                      | 17     |

Limit from December 2016- 15.03.18

Science Direct\*

\*Has appeared to change in the past year and a half, can no longer do the same web search as I had done.

| Concept                                                 | Search Term                                                                                                                                                                                                                                                             | Hits    |
|---------------------------------------------------------|-------------------------------------------------------------------------------------------------------------------------------------------------------------------------------------------------------------------------------------------------------------------------|---------|
| 1. personalisation                                      | TITLE-ABSTR-KEY(personalis* OR individualis* OR tailor* OR custom*)                                                                                                                                                                                                     | 53,939  |
| 2. eHealth                                              | TITLE-ABSTR-KEY(ehealth OR e-health OR website OR web OR web-based OR website-based OR online OR internet)                                                                                                                                                              | 171,860 |
| 3. overweight                                           | TITLE-ABSTR-KEY(overweight OR obesity OR obese OR weight management OR weightloss OR weight loss OR diet* OR physical activity)                                                                                                                                         | 212,049 |
| 1+2+3                                                   | (TITLE-ABSTR-KEY((personalis* OR individualis* OR tailor* OR custom*) AND (ehealth OR e-health OR website OR web OR web-based OR website-based OR online OR internet) AND (overweight OR obes* OR weight management OR weightloss OR weight loss OR diet* OR physical). | 1,333   |
| Limit to 2016, 2017, 2018; Review and research articles | 1+2+3                                                                                                                                                                                                                                                                   | 281     |
|                                                         | Title and abstract screen                                                                                                                                                                                                                                               | 8       |

## Pubmed

|                      |                                                                                                                                                                                                                                                  |         |
|----------------------|--------------------------------------------------------------------------------------------------------------------------------------------------------------------------------------------------------------------------------------------------|---------|
| 1. personalisation   | (personalis*[Title] OR individualis*[Title] OR tailor*[Title] OR custom*[Title])                                                                                                                                                                 | 16,915  |
| 2. eHealth           | (ehealth[Title/Abstract] OR e-health[Title/Abstract] OR website[Title/Abstract] OR web[Title/Abstract] OR web-based[Title/Abstract] OR website-based[Title/Abstract] OR online[Title/Abstract] OR internet[Title/Abstract])                      | 193,800 |
| 3. overweight        | (overweight[Title/Abstract] OR obesity[Title/Abstract] OR obese[Title/Abstract] OR weight management[Title/Abstract] OR weight loss[Title/Abstract] OR weightloss[Title/Abstract] OR diet*[Title/Abstract] OR physical activity[Title/Abstract]) | 757,018 |
| 4.                   |                                                                                                                                                                                                                                                  | 149     |
| 5. Limit to 15.03.18 |                                                                                                                                                                                                                                                  | 19      |

## Embase

| Concept            | Search Term                                                                                                                                                                                  | Hits    |
|--------------------|----------------------------------------------------------------------------------------------------------------------------------------------------------------------------------------------|---------|
| 1. personalisation | personalis*:ti OR individualis*:ti OR tailor*:ti OR custom*:ti                                                                                                                               | 19,875  |
| 2. eHealth         | ehealth:ab,ti OR 'e health':ab,ti OR website:ab,ti OR web:ab,ti OR 'web based':ab,ti OR 'website based':ab,ti OR online:ab,ti OR internet:ab,ti                                              | 250,862 |
| 3. overweight      | overweight:ab,ti OR obesity:ab,ti OR obese:ab,ti OR weight:ab,ti AND management:ab,ti OR weightloss:ab,ti OR weight:ab,ti AND loss:ab,ti OR diet*:ab,ti OR physical:ab,ti AND activity:ab,ti | 262,710 |
| 1+2+3              |                                                                                                                                                                                              | 123     |
| Limit to 2016-2018 |                                                                                                                                                                                              | 22      |

## Web of Science

Indexes=SCI-EXPANDED, SSCI, A&HCI, CPCI-S, CPCI-SSH, BKCI-S, BKCI-SSH, ESCI, CCR-EXPANDED, IC  
Timespan=All years

| Concept                            | Search Term                                                                                                             | Hits      |
|------------------------------------|-------------------------------------------------------------------------------------------------------------------------|-----------|
| 1. personalisation                 | TITLE: (personalis* OR individualis* OR tailor* OR custom*)                                                             | 70,041    |
| 2. eHealth                         | TOPIC: (ehealth or e-health or website or web or web-based or website-based or online or internet)                      | 753,829   |
| 3. overweight                      | TOPIC: (overweight or obesity or obese or weight management or weightloss or weight loss or diet* or physical activity) | 1,330,937 |
| 1+2+3                              |                                                                                                                         | 246       |
| Limit to article or review paper   |                                                                                                                         | 216       |
| Limit to 2016-2017 (no 2018 avail) |                                                                                                                         | 58        |
| Limit to relevant dates            |                                                                                                                         | 25        |
